# Supplementary material
Source: publisher site journal article supplement (https://www.spandidos-publications.com/5539/downloadSupplementary)
Supplement: Supplementary file 1 [file downloadSupplementary]

## Sheet: Sheet1
Table SV. Raw reverse transcription-quantitative PCR data
Group	internal reference	CT1	CT2	CT3	Ave CT
Control	β-actin	14.2924	14.7646	14.384	14.4803
Model	β-actin	14.6751	14.7513	14.7257	14.7174
Group	gene	CT1	CT2	CT3	Ave CT	△CT	△△CT	2-△△CT	△CT1	△CT2	△CT3	△△CT1	△△CT2	△△CT3	2-△△CT1	2-△△CT2	2-△△CT3	standard deviation
Control	NONMMUG036949.2	24.291	24.9076	24.2468	24.4818	10.0014	0	1	9.81063	10.4272	9.76648	-0.190811	0.425772	-0.234961	1.14141	0.74444	1.17687	0.240083
Model	NONMMUG036949.2	24.1346	24.2462	24.2635	24.2148	9.49739	-0.504049	1.41819	9.41722	9.52888	9.54609	-0.584226	-0.472564	-0.455356	1.49923	1.38757	1.37112	0.069704
Group	gene	CT1	CT2	CT3	Ave CT	△CT	△△CT	2-△△CT	△CT1	△CT2	△CT3	△△CT1	△△CT2	△△CT3	2-△△CT1	2-△△CT2	2-△△CT3	standard deviation
Control	NONMMUG089165.1	30.6248	30.4751	30.4143	30.5048	16.0244	0	1	16.1445	15.9947	15.934	0.120092	-0.0296879	-0.0904045	0.920129	1.02079	1.06467	0.0741057
Model	NONMMUG089165.1	29.8555	29.4863	29.9285	29.7567	15.0394	-0.985037	1.97936	15.1381	14.7689	15.2111	-0.886305	-1.25552	-0.813289	1.84844	2.38753	1.75721	0.340646
Group	gene	CT1	CT2	CT3	Ave CT	△CT	△△CT	2-△△CT	△CT1	△CT2	△CT3	△△CT1	△△CT2	△△CT3	2-△△CT1	2-△△CT2	2-△△CT3	standard deviation
Control	NONMMUG030447.2	29.6254	29.931	29.5983	29.7183	15.2379	0	1	15.1451	15.4507	15.118	-0.0928281	0.212783	-0.119954	1.06646	0.862871	1.0867	0.123799
Model	NONMMUG030447.2	29.2999	29.6601	29.3745	29.4448	14.7275	-0.510461	1.42451	14.5825	14.9428	14.6571	-0.655383	-0.295165	-0.580836	1.57503	1.22703	1.49572	0.18239
Group	gene	CT1	CT2	CT3	Ave CT	△CT	△△CT	2-△△CT	△CT1	△CT2	△CT3	△△CT1	△△CT2	△△CT3	2-△△CT1	2-△△CT2	2-△△CT3	standard deviation
Control	NONMMUG028702.2	25.9549	25.6139	25.6169	25.7286	11.2482	0	1	11.4745	11.1336	11.1366	0.226292	-0.11463	-0.111662	0.854829	1.0827	1.08047	0.130922
Model	NONMMUG028702.2	24.9139	24.9459	24.9145	24.9248	10.2074	-1.04082	2.0574	10.1966	10.2285	10.1971	-1.05165	-1.01969	-1.05112	2.0729	2.02748	2.07214	0.0260073
Group	gene	CT1	CT2	CT3	Ave CT	△CT	△△CT	2-△△CT	△CT1	△CT2	△CT3	△△CT1	△△CT2	△△CT3	2-△△CT1	2-△△CT2	2-△△CT3	standard deviation
Control	NONMMUG039651.2	26.7509	26.9271	26.5935	26.7572	12.2769	0	1	12.2706	12.4468	12.1132	-0.00626373	0.16995	-0.163687	1.00435	0.888873	1.12015	0.115636
Model	NONMMUG039651.2	26.0815	26.1508	25.9731	26.0685	11.3511	-0.925777	1.89971	11.3641	11.4334	11.2557	-0.912754	-0.843416	-1.02116	1.88264	1.79429	2.02955	0.118839
Group	gene	CT1	CT2	CT3	Ave CT	△CT	△△CT	2-△△CT	△CT1	△CT2	△CT3	△△CT1	△△CT2	△△CT3	2-△△CT1	2-△△CT2	2-△△CT3	standard deviation
Control	NONMMUG032587.2	25.5049	25.609	25.4656	25.5265	11.0461	0	1	11.0245	11.1287	10.9852	-0.0216198	0.0825424	-0.0609226	1.0151	0.944392	1.04313	0.050884
Model	NONMMUG032587.2	24.9268	24.7497	24.7186	24.7984	10.081	-0.96511	1.95221	10.2095	10.0324	10.0013	-0.836666	-1.01377	-1.04489	1.78592	2.01918	2.06321	0.149021
